# Supplementary material for: Structure–activity relationships of strigolactones via a novel, quantitative in planta bioassay
Source: PubMed Central journal article supplement (PMC5913603; doi:10.1093/jxb/ery092), 2018-03-15
Supplement: ery092_suppl_supplementary_data.pdf [file ery092_suppl_supplementary_data.pdf]

## Structure-activity relationship of strigolactones *via* a novel, quantitative *in planta* bioassay

Emma Artuso, Elena Sanchez, Chiara Lombardi, Ivan Visentin, Beatrice Lace, Wajeeha Saeed, Marco Lolli, Piermichele Kobauri, Zahid Ali, Francesca Spyrakis, Pilar Cubas, Francesca Cardinale, and Cristina Prandi

### Supplementary data

**Table S1.** Calibration of the D14::Luc bioassay using (+)-GR24.

#### D14::Luc bioassay

#### (+)-GR24 calibration

GR24 % EFFICIENCY NORMALIZED WITH Low Acetone Control

|                          | Best-fit values          |
|--------------------------|--------------------------|
| LOGIC50                  | -5.791                   |
| HILLSLOPE                | 0.4764                   |
| EC <sub>50</sub>         | 1.619e-006               |
| Std. Error               |                          |
| LOGIC50                  | 0.1276                   |
| HILLSLOPE                | 0.06399                  |
| 95% Confidence Intervals |                          |
| LOGIC50                  | -6.052 to -5.529         |
| HILLSLOPE                | 0.3454 to 0.6075         |
| EC <sub>50</sub>         | 8.867e-007 to 2.955e-006 |
| Goodness of Fit          |                          |
| Degrees of Freedom       | 28                       |
| R <sup>2</sup>           | 0.8498                   |
| Absolute Sum of Squares  | 4904                     |
| Sy.x                     | 13.23                    |
| Number of points         |                          |
| Analyzed                 | 30                       |
